# Supplementary material
Source: publisher figshare collection journal article supplement (https://acs.figshare.com/ndownloader/files/4586632)
Supplement: Supplementary file 1 [file 4586632]

Supplementary material

A

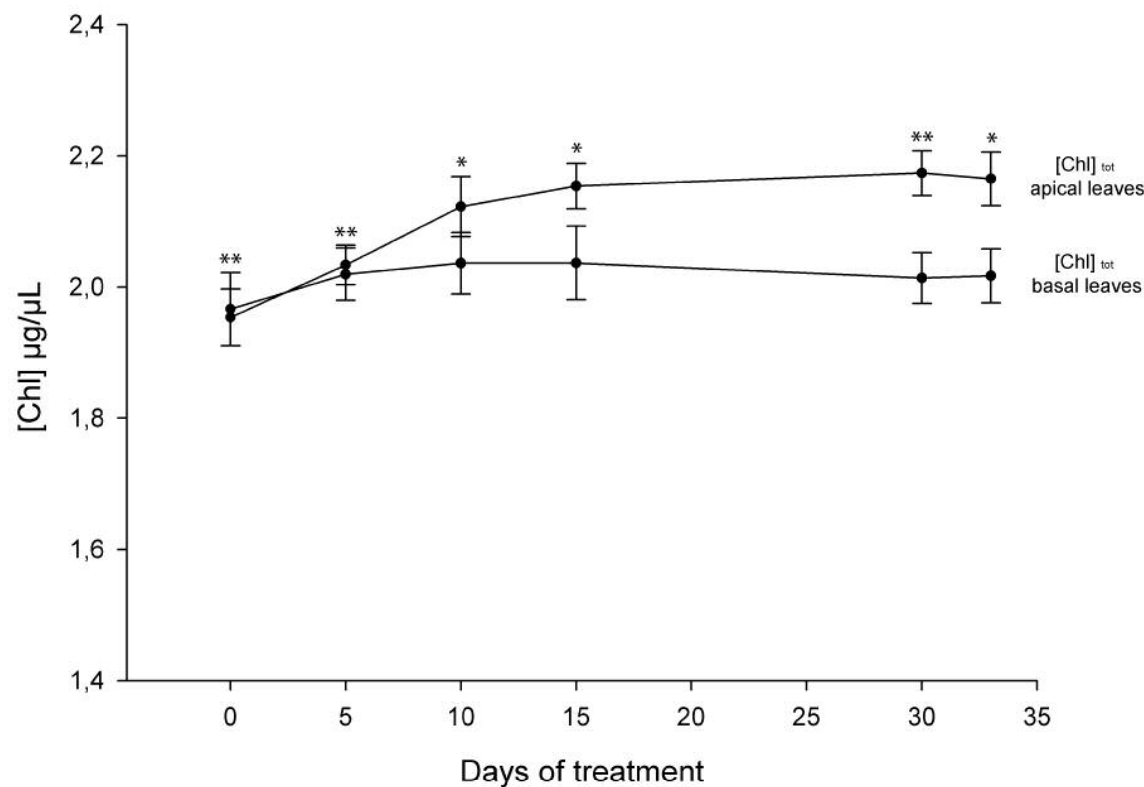

B

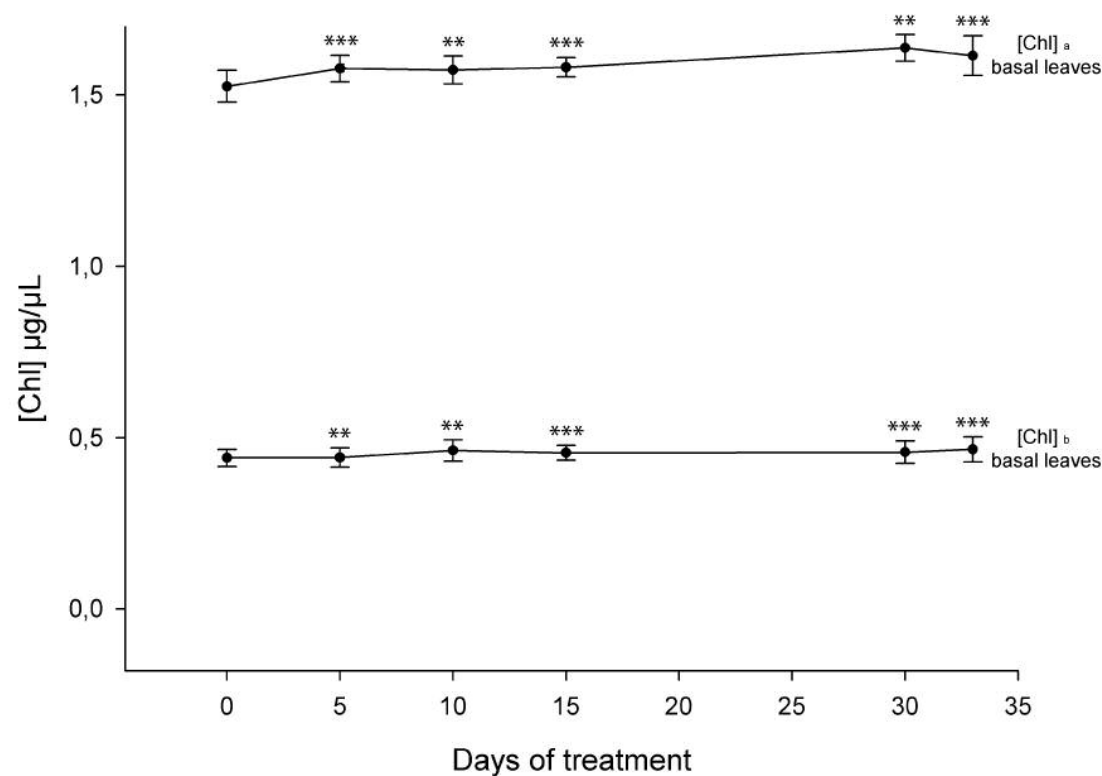

**Supplementary figure 1:** (A) Time course of total Chl concentrations measured in the thylakoid membranes of control spinach plants. For each day the total Chl concentration value ( $[\text{Chl}]_{\text{tot}}$ ) of apical leaves were compared to the corresponding basal leaves value. One-way ANOVA test followed by both Tukey's and Scheffe's means comparison test was performed. \* ( $P < 0.05$ ), \*\* ( $P < 0.01$ ) statistically different from same day basal leaves value. (B) Time course of Chl *a* and Chl *b* concentrations measured in the thylakoid membranes of control plant's basal leaves. \* ( $P < 0.05$ ), \*\* ( $P < 0.01$ ), \*\*\* ( $P < 0.001$ ): statistically different from day 0 Chl *a* and Chl *b* value. One-way ANOVA followed by both Tukey's and Scheffe's test.

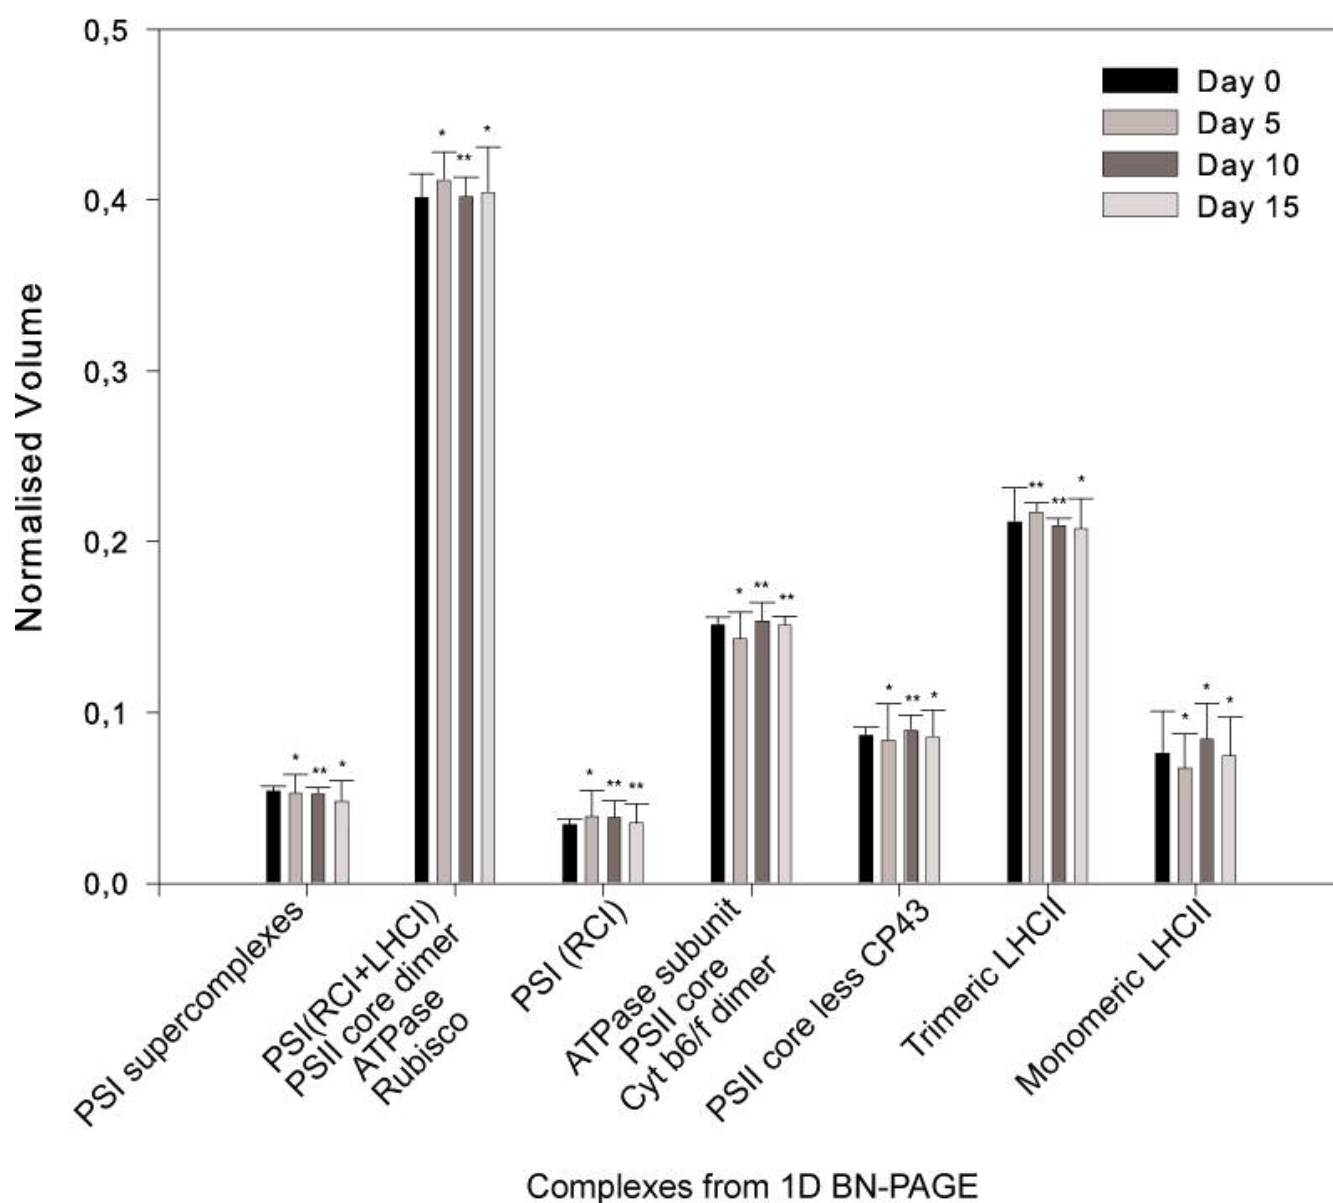

**Supplementary figure 2:** Blue Native PAGE band volumes time course of thylakoid membrane protein complexes extracted from apical leaves of Cd-treated plants (after 0, 5, 10 and 15 days upon 100  $\mu$ M Cd treatment). Results expressed as mean $\pm$ s.e.m. (n=5 per group). One-way ANOVA followed by Tukey's test. \* ( $P < 0.05$ ), \*\* ( $P < 0.01$ ) statistically different from day 0 value.
